# Supplementary material
Source: Copernicus journal article supplement (doi:10.5194/egusphere-2026-2472)
Supplement: Supplementary file 1 [file egusphere-2026-2472-supplement.pdf]

## *Supporting Information*

# **Molecular characteristics and formation pathways of organosulfur compounds: a comparative field study across contrasting atmospheric environments**

Dongmei Cai<sup>1,2,3</sup>, Xianda Gong<sup>1,2\*</sup>, Runqi Zhang<sup>3</sup>, Shenyang Zhang<sup>4</sup>, Yuhan Cheng<sup>1,2</sup>, Saidur Rahaman<sup>1,2</sup>, Yin Fang<sup>4</sup>, Jianmin Chen<sup>3\*</sup>

*<sup>1</sup>Key Laboratory of Coastal Environment and Resources of Zhejiang Province, School of Engineering, Westlake University, Hangzhou, Zhejiang 310030, China*

*<sup>2</sup>Research Center for Industries of the Future, Westlake University, Hangzhou, Zhejiang 310030, China*

*<sup>3</sup>Shanghai Key Laboratory of Atmospheric Particle Pollution and Prevention (LAP3), IRDR ICoE on Risk Interconnectivity and Governance on Weather/Climate Extremes Impact and Public Health, Department of Environmental Science and Engineering, Fudan University, Shanghai 200438, China*

*<sup>4</sup>State Key Laboratory of Estuarine and Coastal Research, Institute of Eco-Chongming, Blue Carbon Science and Technology Centre, East China Normal University, Shanghai, 200241, China*

Correspondence: Xianda Gong ([gongxianda@westlake.edu.cn](mailto:gongxianda@westlake.edu.cn)) and Jianmin Chen ([jmchen@fudan.edu.cn](mailto:jmchen@fudan.edu.cn))

\*Corresponding author.

|                   |    |
|-------------------|----|
| Number of Page    | 22 |
| Number of Figures | 4  |
| Number of Tables  | 11 |

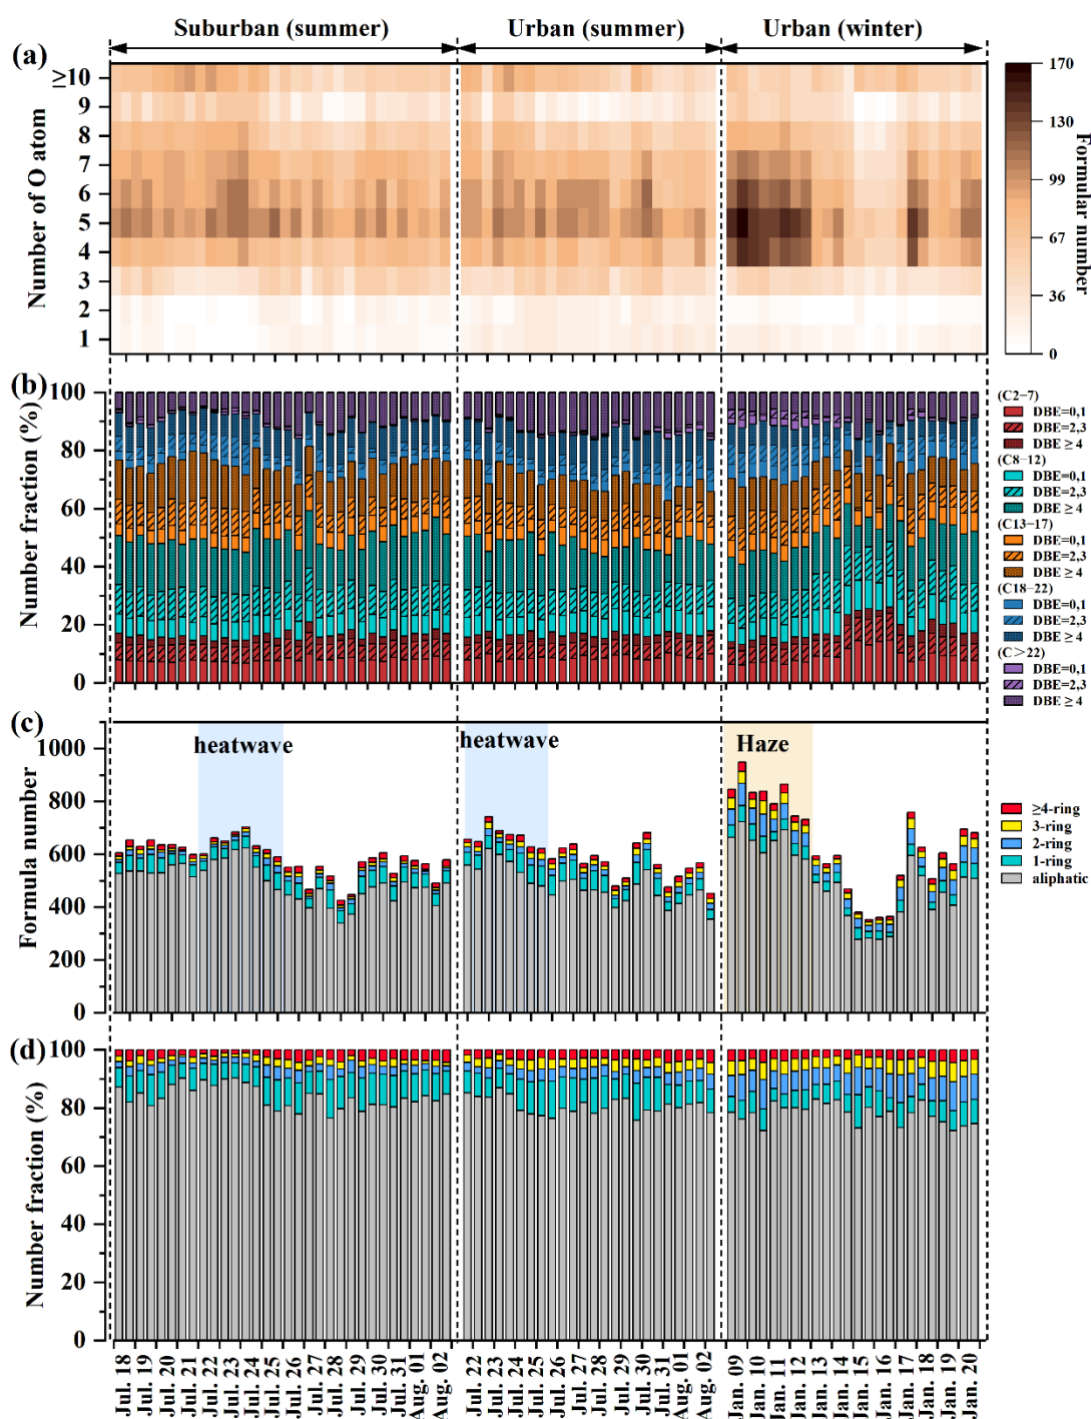

**Figure S1** (a) Number distribution of the total CHOS species sorted by the oxygen atom number in the molecular formulas across the three field campaigns. (b) Formular number percentages of each subgroup which were divided based on the DBE value and the length of carbon skeleton in the CHOS formulas; (c) Formular number and (d) number percentages of each subgroup which were divided based on the Xc value of formulas.

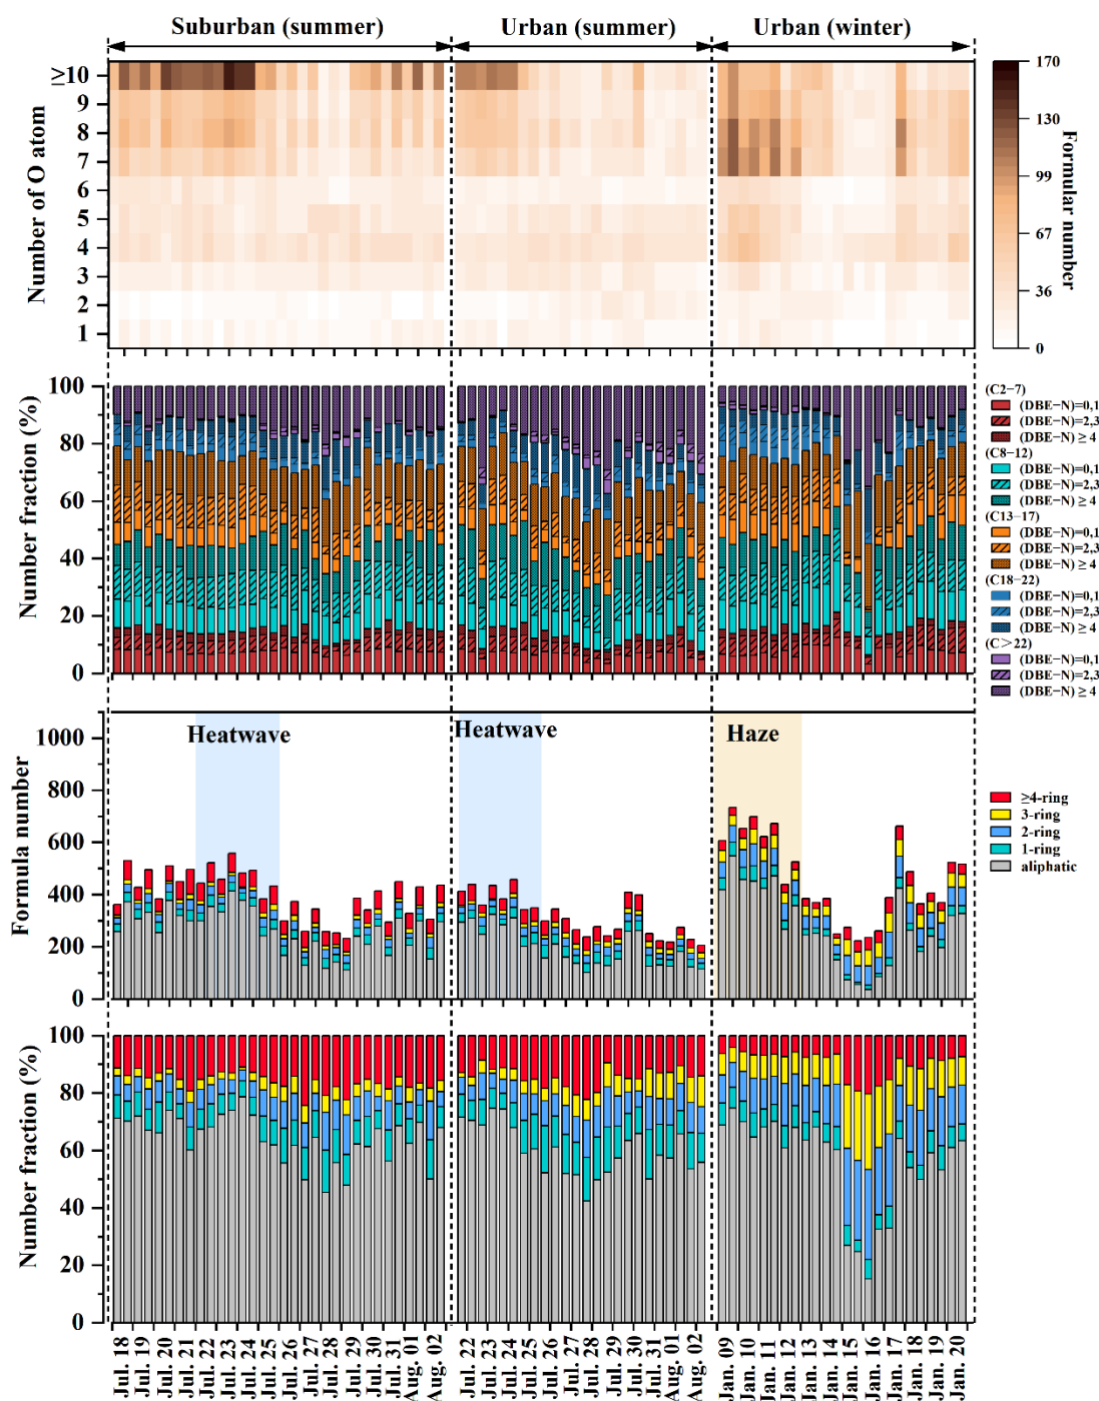

**Figure S2** (a) Number distribution of the total CHONS species sorted by the oxygen atom number in the molecular formulas across the three field campaigns. (b) Formular number percentages of each subgroup which were divided based on the (DBE-N) value and the length of carbon skeleton in the CHONS formulas; (c) Formular number and (d) number percentages of each subgroup which were divided based on the Xc value of formulas.

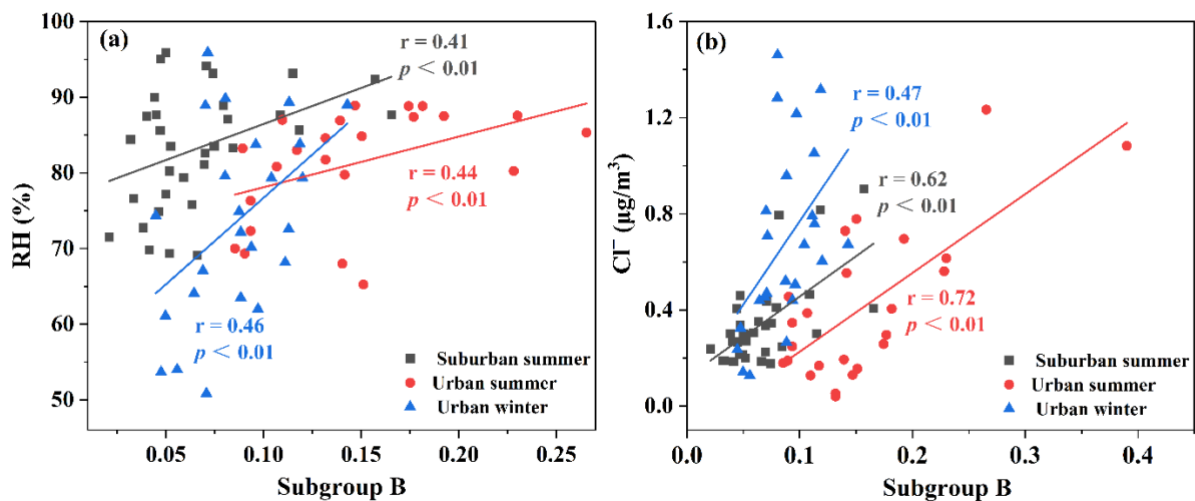

**Figure S3.** Significant correlations of the sum-normalized peak areas of OSs classified into subgroup B (with  $DBE \leq 2$ ,  $C > 8$ ,  $3 < O < 7$  for CHOS) with RH (a) and  $Cl^-$  (b).

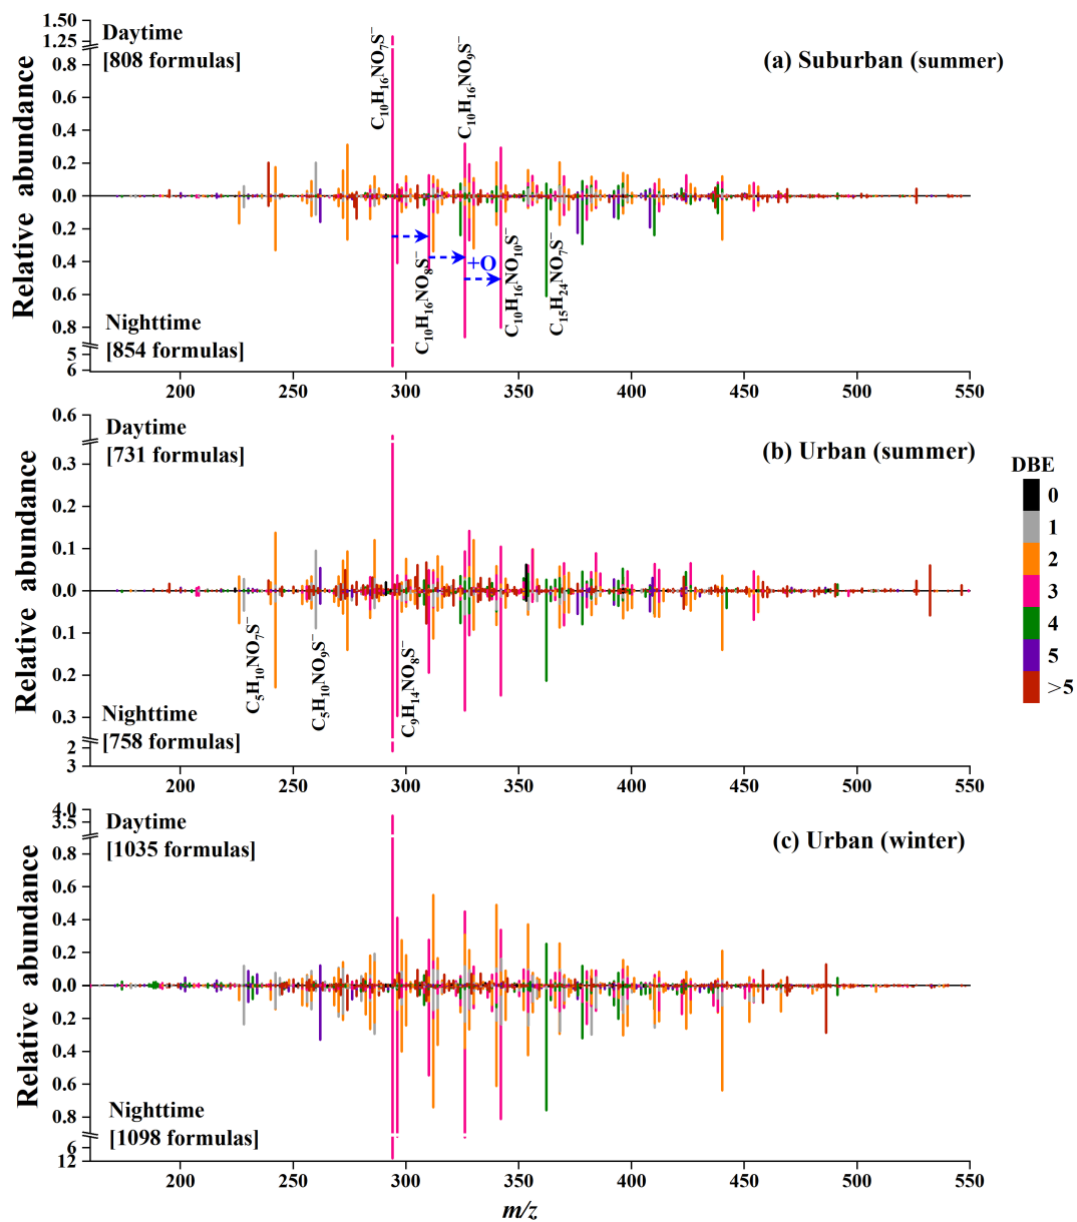

**Figure S4** The relative abundance distribution of detected CHONS compounds in the suburban (a, summer) and urban (b, summer; c, winter). The color bar denotes the DBE of CHONS compounds. Note that the abundances of IS in each sample were set arbitrarily to 100%.

**Table S1.** The concentrations of PM<sub>2.5</sub>, gaseous pollutants, and meteorological parameters in the suburban (summer) and urban (summer, winter) of Shanghai. The involved abbreviations included temperature (T), relative humidity (RH), and wind speed (WS).

|                                                                      | Suburban<br>summer | Daytime     | Nighttime   | Urban<br>summer | Daytime     | Nighttime   | Urban<br>winter | Daytime     | Nighttime   |
|----------------------------------------------------------------------|--------------------|-------------|-------------|-----------------|-------------|-------------|-----------------|-------------|-------------|
| I. PM <sub>2.5</sub> and gaseous pollutants ( $\mu\text{g m}^{-3}$ ) |                    |             |             |                 |             |             |                 |             |             |
| PM <sub>2.5</sub>                                                    | 14.6 ± 7.67        | 16.7 ± 8.15 | 12.5 ± 6.50 | 17.9 ± 9.44     | 20.5 ± 9.41 | 15.4 ± 8.76 | 50.8 ± 34.0     | 50.1 ± 31.4 | 51.6 ± 36.4 |
| SO <sub>2</sub>                                                      | 2.21 ± 0.61        | 2.05 ± 0.60 | 2.16 ± 0.60 | 4.56 ± 1.15     | 5.05 ± 1.37 | 4.06 ± 0.90 | 8.08 ± 2.18     | 8.34 ± 2.29 | 7.81 ± 2.03 |
| NO <sub>x</sub>                                                      | 17.7 ± 8.91        | 13.1 ± 5.80 | 22.9 ± 9.11 | 25.7 ± 8.22     | 23.7 ± 7.35 | 27.6 ± 9.26 | 56.5 ± 26.5     | 53.8 ± 21.8 | 59.2 ± 30.4 |
| CO                                                                   | 456 ± 88.7         | 477 ± 70.7  | 435 ± 99.2  | 779 ± 80.1      | 785 ± 76.2  | 774 ± 83.3  | 1174 ± 271      | 1108 ± 266  | 1239 ± 282  |
| O <sub>3</sub>                                                       | 78.5 ± 25.2        | 95.3 ± 33.7 | 61.7 ± 13.8 | 61.3 ± 17.3     | 75.9 ± 24.3 | 46.7 ± 11.7 | 42.8 ± 22.5     | 50.9 ± 21.4 | 34.6 ± 23.2 |
| OC                                                                   | 2.51 ± 5.59        | 3.49 ± 2.82 | 1.52 ± 1.87 | 3.46 ± 2.55     | 4.09 ± 3.04 | 2.87 ± 1.82 | 6.60 ± 5.47     | 6.36 ± 4.08 | 6.84 ± 6.55 |
| EC                                                                   | 0.49 ± 0.48        | 0.66 ± 0.54 | 0.31 ± 0.32 | 1.03 ± 0.90     | 1.23 ± 1.07 | 0.83 ± 0.62 | 2.77 ± 1.77     | 2.73 ± 1.31 | 2.80 ± 2.13 |
| II. Meteorological parameters                                        |                    |             |             |                 |             |             |                 |             |             |
| T (°C)                                                               | 28.7 ± 1.70        | 29.9 ± 1.39 | 27.4 ± 0.83 | 30.8 ± 1.54     | 32.4 ± 1.38 | 29.1 ± 0.59 | 7.64 ± 3.28     | 9.43 ± 3.44 | 5.84 ± 3.13 |
| RH (%)                                                               | 83.3 ± 7.78        | 78.1 ± 6.95 | 88.6 ± 4.29 | 80.8 ± 7.60     | 76.0 ± 7.94 | 85.5 ± 2.78 | 75.7 ± 13.9     | 67.6 ± 14.3 | 83.7 ± 7.26 |
| WS (m s <sup>-1</sup> )                                              | 2.45 ± 1.14        | 2.85 ± 0.98 | 2.05 ± 1.16 | 4.70 ± 1.13     | 5.07 ± 1.21 | 4.33 ± 0.91 | 3.39 ± 1.60     | 3.90 ± 1.16 | 2.88 ± 1.81 |

**Table S2.** Summary of molecular characteristics of CHOS and CHONS compounds detected in suburban and urban PM<sub>2.5</sub> samples from Shanghai.

| Sample ID       | Group | Subgroup                         | Number of formulas    | % of total OrgS number | % of total OrgS Intensity | % of formulas number with $(4s+3n)/o \leq 1$ | % of formulas intensity with $(4s+3n)/o \leq 1$ | MW <sub>w</sub> | H/C <sub>w</sub> | O/C <sub>w</sub> | DBE <sub>w</sub> | Xc <sub>w</sub>  |
|-----------------|-------|----------------------------------|-----------------------|------------------------|---------------------------|----------------------------------------------|-------------------------------------------------|-----------------|------------------|------------------|------------------|------------------|
| Suburban Summer | CHOS  | CHOS <sub>1</sub>                | 418–688               | 58.4±3.33              | 64.8±16.0                 | 88.2±3.80                                    | 86.1±13.9                                       | 300±16.2        | 1.87±0.06        | 0.58±0.15        | 2.05±0.46        | 0.37±0.24        |
|                 |       | <b>Total</b>                     | <b>425–703 (1069)</b> | <b>59.8±3.41</b>       | <b>65.2±16.1</b>          | <b>86.6±3.71</b>                             | <b>86.2±13.8</b>                                | <b>300±16.0</b> | <b>1.88±0.06</b> | <b>0.58±0.14</b> | <b>2.06±0.46</b> | <b>0.37±0.24</b> |
| Urban Summer    | CHOS  | CHOS <sub>1</sub>                | 439–677               | 64.8±3.36              | 76.7±12.4                 | 84.4±2.38                                    | 85.3±11.6                                       | 301±16.4        | 1.82±0.04        | 0.53±0.11        | 2.11±0.43        | 0.42±0.26        |
|                 |       | <b>Total</b>                     | <b>452–689 (1127)</b> | <b>66.4±3.56</b>       | <b>77.1±12.6</b>          | <b>83.2±2.53</b>                             | <b>85.2±11.5</b>                                | <b>302±16.5</b> | <b>1.81±0.04</b> | <b>0.53±0.11</b> | <b>2.18±0.44</b> | <b>0.43±0.27</b> |
| Urban Winter    | CHOS  | CHOS <sub>1</sub>                | 324–846               | 59.5±4.07              | 73.8±8.44                 | 89.2±2.13                                    | 91.7±7.37                                       | 285±15.4        | 1.62±0.03        | 0.45±0.06        | 2.48±0.46        | 0.58±0.31        |
|                 |       | <b>Total</b>                     | <b>330–949 (1412)</b> | <b>60.8±4.11</b>       | <b>73.9±8.44</b>          | <b>87.5±2.25</b>                             | <b>91.6±7.36</b>                                | <b>285±15.4</b> | <b>1.62±0.03</b> | <b>0.45±0.06</b> | <b>2.56±0.47</b> | <b>0.60±0.31</b> |
| Suburban Summer | CHONS | CHON <sub>1</sub> S <sub>1</sub> | 139–438               | 29.0±4.30              | 31.9±16.4                 | 62.3±11.3                                    | 88.2±12.4                                       | 321±10.2        | 1.71±0.06        | 0.83±0.09        | 3.20±0.50        | 0.17±0.21        |
|                 |       | CHON <sub>2</sub> S <sub>1</sub> | 60–111                | 8.37±1.31              | 2.29±1.59                 | 8.45±3.55                                    | 5.36±3.39                                       | 332±29.4        | 0.76±0.15        | 0.37±0.09        | 12.6±2.41        | 2.50±0.17        |
|                 |       | <b>Total</b>                     | <b>231–558 (895)</b>  | <b>40.2±3.41</b>       | <b>34.8±16.1</b>          | <b>56.3±9.21</b>                             | <b>73.0±10.2</b>                                | <b>325±14.9</b> | <b>1.60±0.17</b> | <b>0.77±0.11</b> | <b>4.27±1.73</b> | <b>0.43±0.47</b> |
| Urban Summer    | CHONS | CHON <sub>1</sub> S <sub>1</sub> | 132–359               | 23.1±4.38              | 18.4±13.6                 | 74.2±9.76                                    | 93.5±9.36                                       | 336±30.2        | 1.67±0.06        | 0.74±0.06        | 3.59±1.56        | 0.29±0.47        |
|                 |       | CHON <sub>2</sub> S <sub>1</sub> | 53–114                | 9.67±1.84              | 4.30±3.81                 | 3.85±3.53                                    | 8.13±3.03                                       | 335±16.5        | 0.75±0.13        | 0.32±0.15        | 13.6±3.47        | 2.59±0.61        |
|                 |       | <b>Total</b>                     | <b>206–458 (787)</b>  | <b>33.6±3.56</b>       | <b>22.9±12.6</b>          | <b>59.7±7.54</b>                             | <b>89.4±9.89</b>                                | <b>332±19.2</b> | <b>1.53±0.26</b> | <b>0.69±0.12</b> | <b>4.89±2.64</b> | <b>0.54±0.55</b> |
| Urban Winter    | CHONS | CHON <sub>1</sub> S <sub>1</sub> | 54–578                | 29.2±7.24              | 23.2±9.81                 | 68.8±4.50                                    | 94.4±3.18                                       | 318±9.72        | 1.63±0.05        | 0.68±0.07        | 4.49±1.16        | 0.59±0.58        |
|                 |       | CHON <sub>2</sub> S <sub>1</sub> | 37–87                 | 7.41±2.91              | 1.99±2.57                 | 12.4±9.35                                    | 21.3±16.0                                       | 358±12.5        | 0.74±0.10        | 0.31±0.09        | 12.1±1.09        | 2.49±0.13        |
|                 |       | <b>Total</b>                     | <b>144–694 (1277)</b> | <b>39.2±4.11</b>       | <b>26.1±8.44</b>          | <b>56.5±6.70</b>                             | <b>92.0±6.54</b>                                | <b>322±9.08</b> | <b>1.44±0.24</b> | <b>0.65±0.17</b> | <b>6.02±2.60</b> | <b>0.88±0.70</b> |

**Table S3.** Comparison of H/C<sub>w</sub> and O/C<sub>w</sub> ratios of CHOS compounds in this study and other studies.

| Sample                 | Location          | Season          | Extraction solution    | H/C <sub>w</sub> | O/C <sub>w</sub> | Instrument  | References                |           |           |           |                     |
|------------------------|-------------------|-----------------|------------------------|------------------|------------------|-------------|---------------------------|-----------|-----------|-----------|---------------------|
| PM <sub>2.5</sub>      | Shanghai (suburb) | Summer          | Methanol               | <b>1.88±0.06</b> | <b>0.58±0.14</b> | Orbitrap MS | This study                |           |           |           |                     |
|                        | Shanghai (urban)  | Summer          |                        | <b>1.81±0.04</b> | <b>0.53±0.11</b> |             |                           |           |           |           |                     |
|                        |                   | Winter          |                        | <b>1.62±0.03</b> | <b>0.45±0.06</b> |             |                           |           |           |           |                     |
| PM <sub>2.5</sub>      | Pearl River Delta |                 | Water                  | 1.67±0.31        | 0.55 ± 0.17      | Orbitrap MS | (Lin et al., 2012)        |           |           |           |                     |
| PM <sub>2.5</sub>      | Cambridge         | winter          | Water and acetonitrile | 1.47             | 0.47             | Orbitrap MS | (Rincón et al., 2012)     |           |           |           |                     |
|                        |                   | summer          |                        | 1.50             | 0.66             |             |                           |           |           |           |                     |
| PM <sub>0.18-1.8</sub> | California        | after midnight  |                        | 1.7±0.05         | 0.87±0.09        | Orbitrap MS | (O'Brien et al., 2014)    |           |           |           |                     |
|                        |                   | morning         |                        | 1.8±0.1          | 0.93±0.1         |             |                           |           |           |           |                     |
|                        |                   | afternoon       |                        | 1.8±0.05         | 0.82±0.09        |             |                           |           |           |           |                     |
|                        |                   | before midnight |                        | 1.8±0.0          | 0.88±0.05        |             |                           |           |           |           |                     |
| TSP                    | Virginia          |                 | Water                  | 1.46±0.35        | 0.47±0.23        | FT-ICR MS   | (Willoughby et al., 2014) |           |           |           |                     |
|                        |                   |                 | Pyridine               | 1.54±0.38        | 0.49±0.31        |             |                           |           |           |           |                     |
|                        |                   |                 | Acetonitrile           | 1.42±0.36        | 0.49±0.32        |             |                           |           |           |           |                     |
| PM <sub>2.5</sub>      | Beijing           | Hazy            | DCM                    | 1.55±0.41        | 0.49±0.26        | FT-ICR MS   | (Jiang et al., 2016)      |           |           |           |                     |
|                        |                   | Clear           |                        | 1.74±0.34        | 0.62±0.34        |             |                           |           |           |           |                     |
|                        |                   | Hazy            | Water                  | 1.64±0.37        | 0.65±0.28        |             |                           |           |           |           |                     |
|                        |                   | Clear           |                        | 1.82±0.26        | 0.75±0.37        |             |                           |           |           |           |                     |
| PM <sub>2.5</sub>      | Wuhan             | Winter          | Methanol               | 1.68±0.44        | 0.37±0.25        | Orbitrap MS | (Wang et al., 2016)       |           |           |           |                     |
|                        |                   | Summer          |                        | 1.75±0.36        | 0.39±0.23        |             |                           |           |           |           |                     |
|                        | Nanjing           | Summer          |                        | 1.68±0.41        | 0.43±0.32        |             |                           |           |           |           |                     |
|                        | Shanghai          | Winter          |                        | 1.68±0.46        | 0.40±0.29        |             |                           |           |           |           |                     |
|                        |                   | Summer          |                        | 1.68±0.42        | 0.47±0.31        |             |                           |           |           |           |                     |
| PM <sub>2.5</sub>      | Shanghai          | Spring          | Acetonitrile           | 1                | 0.2              | Orbitrap MS | (Wang et al., 2017)       |           |           |           |                     |
|                        |                   | Summer          |                        | 1.1              | 0.6              |             |                           |           |           |           |                     |
|                        |                   | Fall            |                        | 1.2              | 0.4              |             |                           |           |           |           |                     |
|                        |                   | Winter          |                        | 1.3              | 0.2              |             |                           |           |           |           |                     |
| PM <sub>2.5</sub>      | Mainz             | low-pollution   | Acetonitrile /water    | 1.66             | 0.78             | Orbitrap MS | (Wang et al., 2018)       |           |           |           |                     |
|                        | Beijing           | low-pollution   |                        | 1.81             | 0.63             |             |                           |           |           |           |                     |
|                        |                   | high-pollution  |                        | 1.74             | 0.51             |             |                           |           |           |           |                     |
| PM <sub>2.5</sub>      | Changchun         |                 | Acetonitrile /water    | 1.56±0.11        | 1.17±0.13        | Orbitrap MS | (Wang et al., 2021)       |           |           |           |                     |
|                        | Shanghai          |                 |                        | 1.85±0.04        | 1.41±0.19        |             |                           |           |           |           |                     |
|                        | Guangzhou         |                 |                        | 1.85±0.02        | 1.48±0.05        |             |                           |           |           |           |                     |
| PM <sub>2.5</sub>      | Guangzhou         | Whole year      | Methanol               | 1.77±0.03        | 0.52±0.07        | FT-ICR MS   | (Jiang et al., 2022)      |           |           |           |                     |
| PM <sub>2.5</sub>      | Beijing           | Winter          | Methanol               | 1.17             | 0.76             | Orbitrap MS | (Wang et al., 2024)       |           |           |           |                     |
|                        |                   | Summer          |                        | 1.37             | 0.60             |             |                           |           |           |           |                     |
|                        | Harbin            | Winter          |                        | 1.20             | 0.73             |             |                           |           |           |           |                     |
|                        |                   | Summer          |                        | 1.35             | 0.60             |             |                           |           |           |           |                     |
|                        | Xi'an             | Winter          |                        | 1.29             | 0.74             |             |                           |           |           |           |                     |
|                        |                   | Summer          |                        | 1.45             | 0.63             |             |                           |           |           |           |                     |
|                        | Chengdu           | Winter          |                        | 1.23             | 0.76             |             |                           |           |           |           |                     |
|                        |                   | Summer          |                        | 1.33             | 0.60             |             |                           |           |           |           |                     |
|                        | Guangzhou         | Winter          |                        | 1.27             | 0.74             |             |                           |           |           |           |                     |
|                        |                   | Summer          |                        | 1.43             | 0.65             |             |                           |           |           |           |                     |
|                        | Wuhan             | Winter          |                        | 1.16             | 0.77             |             |                           |           |           |           |                     |
|                        |                   | Summer          |                        | 1.40             | 0.63             |             |                           |           |           |           |                     |
|                        | PM <sub>2.5</sub> | Anshan          |                        | Winter           | Water            |             |                           | 1.42±0.07 | 0.45±0.05 | FT-ICR MS | (Ning et al., 2025) |

**Table S4.** Comparison of H/C<sub>w</sub> and O/C<sub>w</sub> ratios of CHONS compounds in this study and other studies.

| Sample                 | Location          | Season          | Extraction solution    | H/C <sub>w</sub> | O/C <sub>w</sub> | Instrument  | References                |           |           |           |                     |
|------------------------|-------------------|-----------------|------------------------|------------------|------------------|-------------|---------------------------|-----------|-----------|-----------|---------------------|
| PM <sub>2.5</sub>      | Shanghai (suburb) | Summer          | Methanol               | <b>1.60±0.17</b> | <b>0.77±0.11</b> | Orbitrap MS | This study                |           |           |           |                     |
|                        | Shanghai (urban)  | Summer          |                        | <b>1.53±0.26</b> | <b>0.69±0.12</b> |             |                           |           |           |           |                     |
|                        |                   | Winter          |                        | <b>1.44±0.24</b> | <b>0.65±0.17</b> |             |                           |           |           |           |                     |
| PM <sub>2.5</sub>      | Pearl River Delta |                 | Water                  | 1.73±0.29        | 0.81±0.22        | Orbitrap MS | (Lin et al., 2012)        |           |           |           |                     |
| PM <sub>2.5</sub>      | Cambridge         | Winter          | Water and acetonitrile | 1.99             | 0.73             | Orbitrap MS | (Rincón et al., 2012)     |           |           |           |                     |
|                        |                   | Summer          |                        | 1.65             | 0.80             |             |                           |           |           |           |                     |
| PM <sub>0.18-1.8</sub> | California        | after midnight  |                        | 1.7±0.0          | 0.99±0.02        | Orbitrap MS | (O'Brien et al., 2014)    |           |           |           |                     |
|                        |                   | morning         |                        | 1.7±0.0          | 1.0±0.005        |             |                           |           |           |           |                     |
|                        |                   | afternoon       |                        | 1.7±0.05         | 0.92±0.03        |             |                           |           |           |           |                     |
|                        |                   | before midnight |                        | 1.7±0.05         | 0.89±0.09        |             |                           |           |           |           |                     |
| TSP                    | Virginia          |                 | Water                  | 1.65±0.20        | 0.71±0.21        | FT-ICR MS   | (Willoughby et al., 2014) |           |           |           |                     |
|                        |                   |                 | Pyridine               | 1.52±0.28        | 0.64±0.23        |             |                           |           |           |           |                     |
|                        |                   |                 | Acetonitrile           | 1.27±0.29        | 0.45±0.25        |             |                           |           |           |           |                     |
| PM <sub>2.5</sub>      | Beijing           | Hazy            | DCM                    | 1.57±0.37        | 0.69±0.31        | FT-ICR MS   | (Jiang et al., 2016)      |           |           |           |                     |
|                        |                   | Clear           |                        | 1.75±0.31        | 0.76±0.27        |             |                           |           |           |           |                     |
|                        |                   | Hazy            | Water                  | 1.51±0.37        | 0.70±0.32        |             |                           |           |           |           |                     |
|                        |                   | Clear           |                        | -                | -                |             |                           |           |           |           |                     |
| PM <sub>2.5</sub>      | Wuhan             | Winter          | Methanol               | 1.58±0.46        | 0.35±0.13        | Orbitrap MS | (Wang et al., 2016)       |           |           |           |                     |
|                        |                   | Summer          |                        | 1.69±0.34        | 0.40±0.17        |             |                           |           |           |           |                     |
|                        | Nanjing           | Summer          |                        | 1.69±0.35        | 0.44±0.21        |             |                           |           |           |           |                     |
|                        | Shanghai          | Winter          |                        | 1.64±0.52        | 0.42±0.27        |             |                           |           |           |           |                     |
| Summer                 |                   | 1.64±0.47       | 0.53±0.38              |                  |                  |             |                           |           |           |           |                     |
| PM <sub>2.5</sub>      | Shanghai          | Spring          | Acetonitrile           | 1.5              | 0.2              | Orbitrap MS | (Wang et al., 2017)       |           |           |           |                     |
|                        |                   | Summer          |                        | 1.5              | 0.4              |             |                           |           |           |           |                     |
|                        |                   | Fall            |                        | 1.6              | 0.3              |             |                           |           |           |           |                     |
|                        |                   | Winter          |                        | 1.5              | 0.4              |             |                           |           |           |           |                     |
| PM <sub>2.5</sub>      | Mainz             | Low pollution   | Acetonitrile/water     | 1.54             | 0.91             | Orbitrap MS | (Wang et al., 2018)       |           |           |           |                     |
|                        | Beijing           | Low pollution   |                        | 1.57             | 0.81             |             |                           |           |           |           |                     |
|                        |                   | High pollution  |                        | 1.56             | 0.59             |             |                           |           |           |           |                     |
| PM <sub>2.5</sub>      | Changchun         |                 | Acetonitrile/water     | 1.35±0.02        | 1.07±0.11        | Orbitrap MS | (Wang et al., 2021)       |           |           |           |                     |
|                        | Shanghai          |                 |                        | 1.56±0.03        | 1.00±0.13        |             |                           |           |           |           |                     |
|                        | Guangzhou         |                 |                        | 1.56±0.04        | 0.82±0.03        |             |                           |           |           |           |                     |
| PM <sub>2.5</sub>      | Guangzhou         | Whole year      | Methanol               | 1.72±0.03        | 0.72±0.06        | FT-ICR MS   | (Jiang et al., 2022)      |           |           |           |                     |
| PM <sub>2.5</sub>      | Beijing           | Winter          | Methanol               | 1.15             | 1.02             | Orbitrap MS | (Wang et al., 2024)       |           |           |           |                     |
|                        |                   | Summer          |                        | 1.28             | 0.96             |             |                           |           |           |           |                     |
|                        | Harbin            | Winter          |                        | 1.30             | 1.08             |             |                           |           |           |           |                     |
|                        |                   | Summer          |                        | 1.26             | 0.98             |             |                           |           |           |           |                     |
|                        | Xi'an             | Winter          |                        | 1.26             | 1.04             |             |                           |           |           |           |                     |
|                        |                   | Summer          |                        | 1.39             | 0.99             |             |                           |           |           |           |                     |
|                        | Chengdu           | Winter          |                        | 1.17             | 1.02             |             |                           |           |           |           |                     |
|                        |                   | Summer          |                        | 1.34             | 0.91             |             |                           |           |           |           |                     |
|                        | Guangzhou         | Winter          |                        | 1.20             | 1.02             |             |                           |           |           |           |                     |
|                        |                   | Summer          |                        | 1.51             | 0.82             |             |                           |           |           |           |                     |
|                        | Wuhan             | Winter          |                        | 1.12             | 1.06             |             |                           |           |           |           |                     |
|                        |                   | Summer          |                        | 1.49             | 1.00             |             |                           |           |           |           |                     |
|                        | PM <sub>2.5</sub> | Anshan          |                        | Winter           | Water            |             |                           | 1.43±0.09 | 0.55±0.07 | FT-ICR MS | (Ning et al., 2025) |

**Table S5.** Molecular information and their relative abundance of isoprene-derived organosulfates detected at Shanghai. Noted the formulas in the Table S5–S10 were from the summarization of recent studies and the reference in (Bruggemann et al., 2020; Wang et al., 2019; Ye et al., 2020; Zhu et al., 2019).

| Molecular formula                                | $m/z$<br>[M-H] <sup>-</sup> | DBE | Relative peak area (%) |              |              |
|--------------------------------------------------|-----------------------------|-----|------------------------|--------------|--------------|
|                                                  |                             |     | Suburban Summer        | Urban Summer | Urban Winter |
| C <sub>2</sub> H <sub>6</sub> O <sub>5</sub> S   | 140.9863                    | 0   | 3.05                   | 3.67         | 3.62         |
| C <sub>3</sub> H <sub>4</sub> O <sub>8</sub> S   | 198.9554                    | 2   | 0.53                   | 0.47         | 1.35         |
| C <sub>3</sub> H <sub>6</sub> O <sub>6</sub> S   | 168.9812                    | 1   | 6.93                   | 5.14         | 12.58        |
| C <sub>3</sub> H <sub>6</sub> O <sub>7</sub> S   | 184.9761                    | 1   | 0.18                   | 0.49         | 2.64         |
| C <sub>3</sub> H <sub>6</sub> O <sub>8</sub> S   | 200.9711                    | 1   | 0.74                   | 0.25         | 1.07         |
| C <sub>3</sub> H <sub>6</sub> O <sub>9</sub> S   | 216.9660                    | 1   | 1.25                   | 0.88         | 3.00         |
| C <sub>3</sub> H <sub>8</sub> O <sub>6</sub> S   | 170.9969                    | 0   | 0.08                   | 0.02         | 0.21         |
| C <sub>4</sub> H <sub>6</sub> O <sub>5</sub> S   | 164.9863                    | 2   | 3.27                   | 2.73         | 2.68         |
| C <sub>4</sub> H <sub>6</sub> O <sub>6</sub> S   | 180.9812                    | 2   | 3.32                   | 1.53         | 3.80         |
| C <sub>4</sub> H <sub>8</sub> O <sub>5</sub> S   | 167.0020                    | 1   | 4.22                   | 2.44         | 6.01         |
| C <sub>4</sub> H <sub>8</sub> O <sub>6</sub> S   | 182.9969                    | 1   | 16.51                  | 11.79        | 12.95        |
| C <sub>4</sub> H <sub>8</sub> O <sub>7</sub> S   | 198.9918                    | 1   | 2.62                   | 3.52         | 0.30         |
| C <sub>4</sub> H <sub>8</sub> O <sub>8</sub> S   | 214.9867                    | 1   | 0.06                   | 0.07         | 0.55         |
| C <sub>4</sub> H <sub>8</sub> O <sub>9</sub> S   | 230.9816                    | 1   | 0.21                   | 0.13         | 0.82         |
| C <sub>5</sub> H <sub>8</sub> O <sub>6</sub> S   | 194.9969                    | 2   | 8.06                   | 6.02         | 9.75         |
| C <sub>5</sub> H <sub>8</sub> O <sub>7</sub> S   | 210.9918                    | 2   | 4.48                   | 1.14         | 6.63         |
| C <sub>5</sub> H <sub>8</sub> O <sub>8</sub> S   | 226.9867                    | 2   | 1.63                   | 2.87         | 1.63         |
| C <sub>5</sub> H <sub>8</sub> O <sub>11</sub> S  | 274.9715                    | 2   | 1.23                   | 0.89         | 2.35         |
| C <sub>5</sub> H <sub>10</sub> O <sub>5</sub> S  | 181.0176                    | 1   | 5.72                   | 5.69         | 20.68        |
| C <sub>5</sub> H <sub>10</sub> O <sub>6</sub> S  | 197.0125                    | 1   | 10.57                  | 9.76         | 17.33        |
| C <sub>5</sub> H <sub>10</sub> O <sub>7</sub> S  | 213.0074                    | 1   | 2.94                   | 1.88         | 3.10         |
| C <sub>5</sub> H <sub>10</sub> O <sub>8</sub> S  | 229.0024                    | 1   | 5.63                   | 0.13         | 0.44         |
| C <sub>5</sub> H <sub>12</sub> O <sub>6</sub> S  | 199.0282                    | 0   | 0.31                   | 0.25         | 0.66         |
| C <sub>5</sub> H <sub>12</sub> O <sub>7</sub> S  | 215.0231                    | 0   | 16.41                  | 7.75         | 10.32        |
| C <sub>5</sub> H <sub>12</sub> O <sub>8</sub> S  | 231.0180                    | 0   | 1.32                   | 0.98         | 2.45         |
| C <sub>7</sub> H <sub>10</sub> O <sub>6</sub> S  | 221.0125                    | 3   | 1.62                   | 1.09         | 3.80         |
| C <sub>7</sub> H <sub>10</sub> O <sub>7</sub> S  | 237.0074                    | 3   | 5.42                   | 3.17         | 5.66         |
| C <sub>8</sub> H <sub>12</sub> O <sub>6</sub> S  | 235.0282                    | 3   | 0.56                   | 0.46         | 2.36         |
| C <sub>8</sub> H <sub>12</sub> O <sub>7</sub> S  | 251.0231                    | 3   | 8.20                   | 4.66         | 13.64        |
| C <sub>8</sub> H <sub>14</sub> O <sub>5</sub> S  | 221.0489                    | 2   | 3.52                   | 2.42         | 11.83        |
| C <sub>8</sub> H <sub>14</sub> O <sub>6</sub> S  | 237.0438                    | 2   | 13.77                  | 9.04         | 21.72        |
| C <sub>8</sub> H <sub>14</sub> O <sub>7</sub> S  | 253.0387                    | 2   | 33.92                  | 17.88        | 20.05        |
| C <sub>8</sub> H <sub>14</sub> O <sub>8</sub> S  | 269.0337                    | 2   | 6.85                   | 1.49         | 6.20         |
| C <sub>8</sub> H <sub>14</sub> O <sub>10</sub> S | 301.0235                    | 2   | 0.10                   | 0.24         | 0.61         |
| C <sub>9</sub> H <sub>16</sub> O <sub>7</sub> S  | 267.0544                    | 2   | 50.43                  | 25.62        | 35.43        |

|                       |          |   |       |       |       |
|-----------------------|----------|---|-------|-------|-------|
| $C_{10}H_{20}O_{10}S$ | 331.0704 | 1 | 0.04  | 0.05  | 0.05  |
| $C_{10}H_{22}O_{10}S$ | 333.0861 | 0 | 0.23  | 0.14  | 0.19  |
| $C_{12}H_{18}O_8S$    | 321.0650 | 4 | 3.48  | 2.60  | 2.80  |
| $C_{12}H_{20}O_6S$    | 291.0908 | 3 | 1.96  | 1.58  | 5.50  |
| $C_{15}H_{32}O_{13}S$ | 451.1491 | 0 | 0.49  | 0.23  | 1.76  |
| $C_5H_{11}NO_7S$      | 228.0183 | 1 | 6.49  | 3.88  | 13.11 |
| $C_5H_{11}NO_8S$      | 244.0133 | 1 | 1.22  | 0.81  | 3.78  |
| $C_5H_{11}NO_9S$      | 260.0082 | 1 | 15.82 | 9.21  | 2.20  |
| $C_5H_9NO_{10}S$      | 273.9874 | 2 | 29.00 | 11.79 | 0.96  |
| $C_5H_{10}N_2O_{11}S$ | 304.9933 | 2 | 0.43  | 0.09  | 0.78  |
| $C_8H_{13}NO_{12}S$   | 346.0086 | 3 | 0.18  | 0.11  | 1.32  |

**Table S6.** Molecular information and their relative abundance of monoterpene-derived organosulfates detected at Shanghai.

| Precursor group                                 | Molecular formula                               | $m/z$<br>[M-H] <sup>-</sup> | DBE  | Relative peak area (%) |              |              |
|-------------------------------------------------|-------------------------------------------------|-----------------------------|------|------------------------|--------------|--------------|
|                                                 |                                                 |                             |      | Suburban Summer        | Urban Summer | Urban Winter |
| Monoterpene                                     | C <sub>3</sub> H <sub>6</sub> O <sub>8</sub> S  | 200.9711                    | 1    | 0.76                   | 0.42         | 1.36         |
|                                                 | C <sub>5</sub> H <sub>8</sub> O <sub>8</sub> S  | 226.9867                    | 2    | 1.63                   | 2.87         | 1.63         |
|                                                 | C <sub>5</sub> H <sub>10</sub> O <sub>8</sub> S | 229.0024                    | 1    | 0.27                   | 0.13         | 0.44         |
|                                                 | C <sub>5</sub> H <sub>12</sub> O <sub>6</sub> S | 199.0282                    | 0    | 0.36                   | 0.25         | 0.66         |
|                                                 | C <sub>5</sub> H <sub>12</sub> O <sub>7</sub> S | 215.0231                    | 0    | 0.27                   | 0.18         | 0.72         |
|                                                 | C <sub>6</sub> H <sub>12</sub> O <sub>4</sub> S | 179.0384                    | 1    | 1.77                   | 2.05         | 18.69        |
|                                                 | C <sub>6</sub> H <sub>12</sub> O <sub>6</sub> S | 211.0282                    | 1    | 20.30                  | 14.53        | 45.85        |
|                                                 | C <sub>6</sub> H <sub>12</sub> O <sub>8</sub> S | 243.0180                    | 1    | 0.66                   | 0.67         | 0.28         |
|                                                 | C <sub>7</sub> H <sub>8</sub> O <sub>8</sub> S  | 250.9867                    | 4    | 0.60                   | 0.64         | 0.36         |
|                                                 | C <sub>7</sub> H <sub>10</sub> O <sub>8</sub> S | 253.0024                    | 3    | 5.13                   | 1.45         | 2.13         |
|                                                 | C <sub>7</sub> H <sub>12</sub> O <sub>6</sub> S | 223.0282                    | 2    | 7.69                   | 7.49         | 17.66        |
|                                                 | C <sub>7</sub> H <sub>12</sub> O <sub>9</sub> S | 271.0129                    | 2    | 0.71                   | 0.60         | 1.12         |
|                                                 | C <sub>7</sub> H <sub>14</sub> O <sub>6</sub> S | 225.0438                    | 1    | 16.39                  | 10.65        | 37.45        |
|                                                 | C <sub>8</sub> H <sub>10</sub> O <sub>8</sub> S | 265.0024                    | 4    | 0.54                   | 0.76         | 1.25         |
|                                                 | C <sub>8</sub> H <sub>12</sub> O <sub>7</sub> S | 251.0231                    | 3    | 8.20                   | 4.66         | 13.64        |
|                                                 | C <sub>8</sub> H <sub>12</sub> O <sub>8</sub> S | 267.0180                    | 3    | 14.90                  | 11.52        | 3.32         |
|                                                 | C <sub>8</sub> H <sub>14</sub> O <sub>6</sub> S | 237.0438                    | 2    | 13.77                  | 9.04         | 21.72        |
|                                                 | C <sub>8</sub> H <sub>14</sub> O <sub>7</sub> S | 253.0387                    | 2    | 33.92                  | 17.88        | 20.05        |
|                                                 | C <sub>8</sub> H <sub>14</sub> O <sub>9</sub> S | 285.0286                    | 2    | 0.45                   | 0.07         | 0.29         |
|                                                 | C <sub>8</sub> H <sub>18</sub> O <sub>6</sub> S | 241.0751                    | 0    | 0.86                   | 0.42         | 6.28         |
|                                                 | C <sub>8</sub> H <sub>18</sub> O <sub>8</sub> S | 273.0650                    | 0    | 0.85                   | 0.57         | 3.42         |
|                                                 | C <sub>9</sub> H <sub>8</sub> O <sub>7</sub> S  | 258.9918                    | 6    | 0.66                   | 0.42         | 5.70         |
|                                                 | C <sub>9</sub> H <sub>10</sub> O <sub>5</sub> S | 229.0176                    | 5    | 1.87                   | 1.59         | 6.47         |
|                                                 | C <sub>9</sub> H <sub>10</sub> O <sub>6</sub> S | 245.0125                    | 5    | 1.06                   | 0.90         | 7.25         |
|                                                 | C <sub>9</sub> H <sub>12</sub> O <sub>7</sub> S | 263.0231                    | 4    | 2.04                   | 1.49         | 1.71         |
|                                                 | C <sub>9</sub> H <sub>12</sub> O <sub>9</sub> S | 295.0129                    | 4    | 0.60                   | 1.17         | 0.56         |
|                                                 | C <sub>9</sub> H <sub>14</sub> O <sub>6</sub> S | 249.0438                    | 3    | 2.84                   | 2.91         | 6.79         |
|                                                 | C <sub>9</sub> H <sub>14</sub> O <sub>7</sub> S | 265.0387                    | 3    | 17.95                  | 6.82         | 15.11        |
|                                                 | C <sub>9</sub> H <sub>14</sub> O <sub>8</sub> S | 281.0337                    | 3    | 13.86                  | 6.20         | 9.50         |
|                                                 | C <sub>9</sub> H <sub>14</sub> O <sub>9</sub> S | 297.0286                    | 3    | 3.25                   | 0.22         | 1.43         |
|                                                 | C <sub>9</sub> H <sub>16</sub> O <sub>4</sub> S | 219.0697                    | 2    | 0.58                   | 0.54         | 4.01         |
|                                                 | C <sub>9</sub> H <sub>16</sub> O <sub>5</sub> S | 235.0646                    | 2    | 15.59                  | 11.36        | 38.59        |
|                                                 | C <sub>9</sub> H <sub>16</sub> O <sub>6</sub> S | 251.0595                    | 2    | 26.01                  | 17.22        | 49.34        |
|                                                 | C <sub>9</sub> H <sub>16</sub> O <sub>7</sub> S | 267.0544                    | 2    | 50.43                  | 25.62        | 35.43        |
|                                                 | C <sub>9</sub> H <sub>16</sub> O <sub>8</sub> S | 283.0493                    | 2    | 9.53                   | 5.02         | 17.32        |
|                                                 | C <sub>9</sub> H <sub>16</sub> O <sub>9</sub> S | 299.0442                    | 2    | 0.72                   | 0.34         | 0.41         |
| C <sub>9</sub> H <sub>18</sub> O <sub>4</sub> S | 221.0853                                        | 1                           | 3.14 | 2.32                   | 15.43        |              |

|                      |                                                   |          |   |       |       |        |
|----------------------|---------------------------------------------------|----------|---|-------|-------|--------|
|                      | C <sub>9</sub> H <sub>18</sub> O <sub>6</sub> S   | 253.0751 | 1 | 20.61 | 15.06 | 36.02  |
|                      | C <sub>9</sub> H <sub>18</sub> O <sub>7</sub> S   | 269.0700 | 1 | 10.32 | 3.59  | 13.60  |
|                      | C <sub>9</sub> H <sub>20</sub> O <sub>4</sub> S   | 223.1010 | 0 | 8.85  | 15.47 | 24.86  |
|                      | C <sub>10</sub> H <sub>10</sub> O <sub>5</sub> S  | 241.0176 | 6 | 0.52  | 0.43  | 2.51   |
|                      | C <sub>10</sub> H <sub>10</sub> O <sub>7</sub> S  | 273.0074 | 6 | 0.64  | 0.63  | 7.89   |
|                      | C <sub>10</sub> H <sub>12</sub> O <sub>6</sub> S  | 259.0282 | 5 | 2.24  | 1.77  | 3.61   |
|                      | C <sub>10</sub> H <sub>14</sub> O <sub>4</sub> S  | 229.0540 | 4 | 2.60  | 1.36  | 2.74   |
|                      | C <sub>10</sub> H <sub>14</sub> O <sub>6</sub> S  | 261.0438 | 4 | 2.03  | 1.06  | 1.93   |
|                      | C <sub>10</sub> H <sub>14</sub> O <sub>11</sub> S | 341.0184 | 4 | 0.02  | 0.01  | 0.07   |
|                      | C <sub>10</sub> H <sub>16</sub> O <sub>4</sub> S  | 231.0697 | 3 | 4.41  | 2.37  | 7.80   |
|                      | C <sub>10</sub> H <sub>16</sub> O <sub>5</sub> S  | 247.0646 | 3 | 6.46  | 4.07  | 16.45  |
|                      | C <sub>10</sub> H <sub>16</sub> O <sub>6</sub> S  | 263.0595 | 3 | 12.82 | 6.54  | 18.43  |
|                      | C <sub>10</sub> H <sub>16</sub> O <sub>7</sub> S  | 279.0544 | 3 | 47.47 | 23.30 | 67.24  |
|                      | C <sub>10</sub> H <sub>16</sub> O <sub>8</sub> S  | 295.0493 | 3 | 14.38 | 4.44  | 13.00  |
|                      | C <sub>10</sub> H <sub>16</sub> O <sub>9</sub> S  | 311.0442 | 3 | 5.90  | 0.87  | 1.02   |
|                      | C <sub>10</sub> H <sub>16</sub> O <sub>10</sub> S | 327.0391 | 3 | 2.37  | 2.09  | 1.34   |
|                      | C <sub>10</sub> H <sub>18</sub> O <sub>5</sub> S  | 249.0802 | 2 | 11.99 | 8.76  | 25.14  |
|                      | C <sub>10</sub> H <sub>18</sub> O <sub>6</sub> S  | 265.0751 | 2 | 17.15 | 9.58  | 31.55  |
|                      | C <sub>10</sub> H <sub>18</sub> O <sub>7</sub> S  | 281.0700 | 2 | 52.91 | 25.09 | 31.85  |
|                      | C <sub>10</sub> H <sub>18</sub> O <sub>8</sub> S  | 297.0650 | 2 | 13.43 | 5.27  | 14.93  |
|                      | C <sub>10</sub> H <sub>18</sub> O <sub>9</sub> S  | 313.0599 | 2 | 5.11  | 2.04  | 1.52   |
|                      | C <sub>10</sub> H <sub>20</sub> O <sub>5</sub> S  | 251.0959 | 1 | 56.42 | 29.99 | 118.32 |
|                      | C <sub>10</sub> H <sub>20</sub> O <sub>6</sub> S  | 267.0908 | 1 | 11.76 | 6.89  | 23.91  |
|                      | C <sub>10</sub> H <sub>20</sub> O <sub>7</sub> S  | 283.0857 | 1 | 6.66  | 2.38  | 13.58  |
|                      | C <sub>10</sub> H <sub>22</sub> O <sub>4</sub> S  | 237.1166 | 0 | 4.85  | 7.18  | 24.18  |
|                      | C <sub>10</sub> H <sub>22</sub> O <sub>5</sub> S  | 253.1115 | 0 | 0.89  | 0.77  | 7.12   |
|                      | C <sub>11</sub> H <sub>16</sub> O <sub>7</sub> S  | 291.0544 | 4 | 1.23  | 1.21  | 1.80   |
|                      | C <sub>11</sub> H <sub>18</sub> O <sub>8</sub> S  | 309.0650 | 3 | 7.95  | 2.27  | 8.40   |
|                      | C <sub>12</sub> H <sub>12</sub> O <sub>6</sub> S  | 283.0282 | 7 | 0.34  | 0.21  | 0.39   |
| <b>Sesquiterpene</b> | C <sub>14</sub> H <sub>22</sub> O <sub>7</sub> S  | 333.1013 | 4 | 2.74  | 1.63  | 2.41   |
|                      | C <sub>14</sub> H <sub>22</sub> O <sub>8</sub> S  | 349.0963 | 4 | 1.85  | 1.77  | 2.12   |
|                      | C <sub>14</sub> H <sub>24</sub> O <sub>5</sub> S  | 303.1272 | 3 | 2.09  | 0.84  | 4.99   |
|                      | C <sub>14</sub> H <sub>24</sub> O <sub>6</sub> S  | 319.1221 | 3 | 3.10  | 1.59  | 3.43   |
|                      | C <sub>14</sub> H <sub>24</sub> O <sub>8</sub> S  | 351.1119 | 3 | 3.15  | 2.78  | 6.31   |
|                      | C <sub>15</sub> H <sub>24</sub> O <sub>7</sub> S  | 347.1170 | 4 | 7.90  | 3.96  | 4.85   |
|                      | C <sub>15</sub> H <sub>24</sub> O <sub>8</sub> S  | 363.1119 | 4 | 1.62  | 1.17  | 3.38   |
|                      | C <sub>15</sub> H <sub>26</sub> O <sub>5</sub> S  | 317.1428 | 3 | 1.33  | 0.34  | 6.19   |
|                      | C <sub>15</sub> H <sub>26</sub> O <sub>6</sub> S  | 333.1377 | 3 | 1.93  | 0.84  | 3.48   |
|                      | C <sub>16</sub> H <sub>28</sub> O <sub>7</sub> S  | 363.1483 | 3 | 2.28  | 1.28  | 2.86   |
|                      | C <sub>16</sub> H <sub>28</sub> O <sub>8</sub> S  | 379.1432 | 3 | 6.96  | 2.19  | 4.10   |
|                      | C <sub>20</sub> H <sub>32</sub> O <sub>5</sub> S  | 383.1898 | 5 | 3.66  | 1.48  | 1.96   |
|                      | C <sub>20</sub> H <sub>34</sub> O <sub>5</sub> S  | 385.2054 | 4 | 0.67  | 0.23  | 1.06   |

|                |                          |          |   |        |        |        |
|----------------|--------------------------|----------|---|--------|--------|--------|
|                | $C_{20}H_{34}O_9S_2$     | 481.1571 | 4 | 0.14   | 0.01   | 0.23   |
| <b>Terpene</b> | $C_{10}H_{17}NO_7S$      | 294.0653 | 3 | 352.88 | 158.71 | 531.63 |
|                | $C_9H_{15}NO_8S$         | 296.0446 | 3 | 24.04  | 19.32  | 55.92  |
|                | $C_{10}H_{17}NO_8S$      | 310.0602 | 3 | 28.79  | 13.28  | 30.43  |
|                | $C_9H_{15}NO_9S$         | 312.0395 | 3 | 8.53   | 4.14   | 12.81  |
|                | $C_{10}H_{17}NO_9S$      | 326.0551 | 3 | 59.04  | 19.53  | 21.00  |
|                | $C_{10}H_{19}NO_9S$      | 328.0708 | 2 | 10.60  | 5.05   | 17.91  |
|                | $C_9H_{17}NO_{10}S$      | 330.0500 | 2 | 22.12  | 9.87   | 6.22   |
|                | $C_{10}H_{17}NO_{10}S$   | 342.0500 | 3 | 54.93  | 18.18  | 42.47  |
|                | $C_{10}H_{16}N_2O_{10}S$ | 355.0453 | 4 | 1.03   | 0.67   | 2.14   |
|                | $C_{15}H_{25}NO_7S$      | 362.1279 | 4 | 34.29  | 12.63  | 37.31  |
|                | $C_{10}H_{18}N_2O_{11}S$ | 373.0559 | 3 | 1.15   | 0.64   | 1.73   |
|                | $C_{14}H_{25}NO_9S$      | 382.1177 | 3 | 2.88   | 2.01   | 6.77   |
|                | $C_{10}H_{18}N_2O_{12}S$ | 389.0508 | 3 | 1.03   | 0.23   | 1.45   |

**Table S7.** Molecular information and their relative abundance of other biogenic VOCs-derived organosulfates (2-Methyl-3-Buten-2-ol; 2-E-pentenal, 2-E-hexenal, 3-Z-hexenal, cis-3-hexen-1-ol, and  $\beta$ -caryophyllene) detected at Shanghai.

| Molecular formula                                 | $m/z$<br>[M-H] <sup>-</sup> | DBE | Relative peak area (%) |              |              |
|---------------------------------------------------|-----------------------------|-----|------------------------|--------------|--------------|
|                                                   |                             |     | Suburban Summer        | Urban Summer | Urban Winter |
| C <sub>3</sub> H <sub>6</sub> O <sub>6</sub> S    | 168.9812                    | 1   | 6.93                   | 5.14         | 12.58        |
| C <sub>3</sub> H <sub>6</sub> O <sub>7</sub> S    | 184.9761                    | 1   | 0.18                   | 0.49         | 2.64         |
| C <sub>4</sub> H <sub>10</sub> O <sub>5</sub> S   | 169.0176                    | 0   | 3.84                   | 5.57         | 4.77         |
| C <sub>5</sub> H <sub>12</sub> O <sub>6</sub> S   | 199.0282                    | 0   | 0.36                   | 0.25         | 0.66         |
| C <sub>5</sub> H <sub>10</sub> O <sub>7</sub> S   | 213.0074                    | 1   | 2.94                   | 1.88         | 3.1          |
| C <sub>5</sub> H <sub>10</sub> O <sub>8</sub> S   | 229.0024                    | 1   | 0.23                   | 0.13         | 0.44         |
| C <sub>6</sub> H <sub>10</sub> O <sub>6</sub> S   | 209.0125                    | 2   | 11.25                  | 5.78         | 14.19        |
| C <sub>6</sub> H <sub>12</sub> O <sub>6</sub> S   | 211.0282                    | 1   | 20.3                   | 14.53        | 45.85        |
| C <sub>9</sub> H <sub>16</sub> O <sub>6</sub> S   | 251.0595                    | 2   | 26.01                  | 17.22        | 49.34        |
| C <sub>9</sub> H <sub>18</sub> O <sub>7</sub> S   | 269.0700                    | 1   | 10.32                  | 3.59         | 13.6         |
| C <sub>14</sub> H <sub>24</sub> O <sub>5</sub> S  | 303.1272                    | 3   | 2.09                   | 0.84         | 4.99         |
| C <sub>14</sub> H <sub>24</sub> O <sub>6</sub> S  | 319.1221                    | 3   | 3.1                    | 1.59         | 3.43         |
| C <sub>14</sub> H <sub>22</sub> O <sub>7</sub> S  | 333.1013                    | 4   | 2.74                   | 1.63         | 2.41         |
| C <sub>14</sub> H <sub>22</sub> O <sub>8</sub> S  | 349.0963                    | 4   | 1.85                   | 1.77         | 2.12         |
| C <sub>14</sub> H <sub>24</sub> O <sub>8</sub> S  | 351.1119                    | 3   | 3.15                   | 2.78         | 6.31         |
| C <sub>15</sub> H <sub>26</sub> O <sub>5</sub> S  | 317.1428                    | 3   | 1.33                   | 0.34         | 6.19         |
| C <sub>15</sub> H <sub>26</sub> O <sub>6</sub> S  | 333.1377                    | 3   | 1.93                   | 0.84         | 3.48         |
| C <sub>15</sub> H <sub>24</sub> O <sub>7</sub> S  | 347.117                     | 4   | 7.9                    | 3.96         | 4.85         |
| C <sub>15</sub> H <sub>24</sub> O <sub>8</sub> S  | 363.1119                    | 4   | 1.62                   | 1.17         | 3.38         |
| C <sub>16</sub> H <sub>28</sub> O <sub>7</sub> S  | 363.1483                    | 3   | 2.28                   | 1.28         | 2.86         |
| C <sub>16</sub> H <sub>28</sub> O <sub>8</sub> S  | 379.1432                    | 3   | 6.96                   | 2.19         | 4.1          |
| C <sub>14</sub> H <sub>25</sub> NO <sub>9</sub> S | 382.1177                    | 3   | 2.88                   | 2.01         | 6.77         |
| C <sub>15</sub> H <sub>25</sub> NO <sub>7</sub> S | 362.1279                    | 4   | 34.29                  | 12.63        | 37.31        |

**Table S8.** Molecular information and their relative abundance of aromatic-derived organosulfates detected at Shanghai.

| Molecular formula                                  | <i>m/z</i><br>[M-H] <sup>-</sup> | DBE | Relative peak area (%) |              |              |
|----------------------------------------------------|----------------------------------|-----|------------------------|--------------|--------------|
|                                                    |                                  |     | Suburban Summer        | Urban Summer | Urban Winter |
| C <sub>6</sub> H <sub>6</sub> O <sub>4</sub> S     | 172.9914                         | 4   | 0.56                   | 0.31         | 1.18         |
| C <sub>7</sub> H <sub>6</sub> O <sub>4</sub> S     | 184.9914                         | 5   | 0.23                   | 0.28         | 1.18         |
| C <sub>7</sub> H <sub>6</sub> O <sub>5</sub> S     | 200.9863                         | 5   | 2.26                   | 1.70         | 8.29         |
| C <sub>7</sub> H <sub>8</sub> O <sub>4</sub> S     | 187.0071                         | 4   | 0.55                   | 0.71         | 3.01         |
| C <sub>8</sub> H <sub>6</sub> O <sub>6</sub> S     | 228.9812                         | 6   | 0.51                   | 0.35         | 5.74         |
| C <sub>8</sub> H <sub>8</sub> O <sub>4</sub> S     | 199.0071                         | 5   | 0.71                   | 0.43         | 1.37         |
| C <sub>8</sub> H <sub>8</sub> O <sub>5</sub> S     | 215.0020                         | 5   | 3.22                   | 2.61         | 7.46         |
| C <sub>8</sub> H <sub>10</sub> O <sub>4</sub> S    | 201.0227                         | 4   | 1.01                   | 2.73         | 4.73         |
| C <sub>9</sub> H <sub>8</sub> O <sub>5</sub> S     | 227.0020                         | 6   | 0.22                   | 0.06         | 1.89         |
| C <sub>9</sub> H <sub>10</sub> O <sub>5</sub> S    | 229.0176                         | 5   | 1.87                   | 1.59         | 6.47         |
| C <sub>9</sub> H <sub>12</sub> O <sub>4</sub> S    | 215.0384                         | 4   | 0.62                   | 0.75         | 1.70         |
| C <sub>9</sub> H <sub>12</sub> O <sub>5</sub> S    | 231.0333                         | 4   | 0.67                   | 0.65         | 2.24         |
| C <sub>10</sub> H <sub>10</sub> O <sub>6</sub> S   | 257.0125                         | 6   | 0.19                   | 0.26         | 7.13         |
| C <sub>10</sub> H <sub>10</sub> O <sub>7</sub> S   | 273.0074                         | 6   | 0.64                   | 0.63         | 7.89         |
| C <sub>10</sub> H <sub>12</sub> O <sub>7</sub> S   | 275.0231                         | 5   | 0.10                   | 0.05         | 0.57         |
| C <sub>11</sub> H <sub>12</sub> O <sub>7</sub> S   | 287.0231                         | 6   | 1.04                   | 0.58         | 3.75         |
| C <sub>11</sub> H <sub>14</sub> O <sub>7</sub> S   | 289.0387                         | 5   | 0.13                   | 0.19         | 0.28         |
| C <sub>6</sub> H <sub>5</sub> NO <sub>6</sub> S    | 217.9765                         | 5   | 0.07                   | 0.13         | 0.45         |
| C <sub>10</sub> H <sub>11</sub> NO <sub>7</sub> S  | 288.0183                         | 6   | 0.54                   | 0.59         | 3.30         |
| C <sub>10</sub> H <sub>11</sub> NO <sub>8</sub> S  | 304.0133                         | 6   | 0.01                   | 0.07         | 0.38         |
| C <sub>10</sub> H <sub>11</sub> NO <sub>9</sub> S  | 320.0082                         | 6   | 0.17                   | #DIV/0!      | 0.59         |
| C <sub>10</sub> H <sub>17</sub> NO <sub>9</sub> S  | 326.0551                         | 3   | 59.04                  | 19.53        | 21.00        |
| C <sub>11</sub> H <sub>13</sub> NO <sub>8</sub> S  | 318.0289                         | 6   | 0.08                   | 0.09         | 0.23         |
| C <sub>11</sub> H <sub>13</sub> NO <sub>9</sub> S  | 334.0238                         | 6   | 0.11                   | 0.07         | 0.14         |
| C <sub>12</sub> H <sub>15</sub> NO <sub>8</sub> S  | 332.0446                         | 6   | 0.02                   | 0.06         | 0.19         |
| C <sub>12</sub> H <sub>15</sub> NO <sub>10</sub> S | 364.0344                         | 6   | 0.04                   | 0.09         | 0.18         |

**Table S9.** Molecular information and their relative abundance of long-chain alkanes-derived organosulfates detected at Shanghai.

| Molecular formula                                  | $m/z$<br>[M-H] <sup>-</sup> | DBE | Relative peak area (%) |              |              |
|----------------------------------------------------|-----------------------------|-----|------------------------|--------------|--------------|
|                                                    |                             |     | Suburban Summer        | Urban Summer | Urban Winter |
| C <sub>7</sub> H <sub>14</sub> O <sub>5</sub> S    | 209.0489                    | 1   | 22.41                  | 18.24        | 76.35        |
| C <sub>7</sub> H <sub>16</sub> O <sub>4</sub> S    | 195.0697                    | 0   | 2.42                   | 4.03         | 35.49        |
| C <sub>8</sub> H <sub>18</sub> O <sub>4</sub> S    | 209.0853                    | 0   | 11.64                  | 16.55        | 95.01        |
| C <sub>9</sub> H <sub>16</sub> O <sub>7</sub> S    | 267.0544                    | 2   | 50.43                  | 25.62        | 35.43        |
| C <sub>9</sub> H <sub>18</sub> O <sub>5</sub> S    | 237.0802                    | 1   | 18.64                  | 17.03        | 62.95        |
| C <sub>9</sub> H <sub>18</sub> O <sub>7</sub> S    | 269.0700                    | 1   | 10.32                  | 3.59         | 13.60        |
| C <sub>9</sub> H <sub>18</sub> O <sub>8</sub> S    | 285.0650                    | 1   | 0.31                   | 0.15         | 0.29         |
| C <sub>9</sub> H <sub>20</sub> O <sub>8</sub> S    | 287.0806                    | 0   | 0.23                   | 0.09         | 0.98         |
| C <sub>10</sub> H <sub>16</sub> O <sub>8</sub> S   | 295.0493                    | 3   | 14.38                  | 4.44         | 13.00        |
| C <sub>10</sub> H <sub>18</sub> O <sub>6</sub> S   | 265.0751                    | 2   | 17.15                  | 9.58         | 31.55        |
| C <sub>10</sub> H <sub>18</sub> O <sub>7</sub> S   | 281.0700                    | 2   | 52.91                  | 25.09        | 31.85        |
| C <sub>10</sub> H <sub>18</sub> O <sub>8</sub> S   | 297.0650                    | 2   | 13.43                  | 5.27         | 14.93        |
| C <sub>10</sub> H <sub>20</sub> O <sub>5</sub> S   | 251.0959                    | 1   | 56.42                  | 29.99        | 118.32       |
| C <sub>10</sub> H <sub>20</sub> O <sub>6</sub> S   | 267.0908                    | 1   | 11.76                  | 6.89         | 23.91        |
| C <sub>10</sub> H <sub>20</sub> O <sub>8</sub> S   | 299.0806                    | 1   | 0.32                   | 0.15         | 0.33         |
| C <sub>12</sub> H <sub>20</sub> O <sub>7</sub> S   | 307.0857                    | 3   | 6.37                   | 1.44         | 10.26        |
| C <sub>12</sub> H <sub>24</sub> O <sub>5</sub> S   | 279.1272                    | 1   | 88.32                  | 47.93        | 201.25       |
| C <sub>12</sub> H <sub>26</sub> O <sub>4</sub> S   | 265.1479                    | 0   | 64.32                  | 98.49        | 59.52        |
| C <sub>7</sub> H <sub>15</sub> NO <sub>8</sub> S   | 272.0446                    | 1   | 2.85                   | 1.92         | 10.07        |
| C <sub>8</sub> H <sub>15</sub> NO <sub>9</sub> S   | 300.0395                    | 2   | 9.38                   | 5.00         | 15.91        |
| C <sub>9</sub> H <sub>17</sub> NO <sub>7</sub> S   | 282.0653                    | 2   | 1.49                   | 1.36         | 9.15         |
| C <sub>9</sub> H <sub>17</sub> NO <sub>8</sub> S   | 298.0602                    | 2   | 7.46                   | 3.68         | 24.95        |
| C <sub>9</sub> H <sub>17</sub> NO <sub>9</sub> S   | 314.0551                    | 2   | 10.14                  | 5.80         | 19.40        |
| C <sub>9</sub> H <sub>17</sub> NO <sub>10</sub> S  | 330.0500                    | 2   | 22.12                  | 9.87         | 6.22         |
| C <sub>10</sub> H <sub>19</sub> NO <sub>8</sub> S  | 312.0759                    | 2   | 22.81                  | 8.72         | 47.88        |
| C <sub>10</sub> H <sub>19</sub> NO <sub>9</sub> S  | 328.0708                    | 2   | 10.60                  | 5.05         | 17.91        |
| C <sub>10</sub> H <sub>19</sub> NO <sub>10</sub> S | 344.0657                    | 2   | 8.11                   | 3.58         | 11.03        |
| C <sub>10</sub> H <sub>19</sub> NO <sub>11</sub> S | 360.0606                    | 2   | 0.79                   | 0.45         | 1.81         |

**Table S10.** Summary of molecular characteristics of CHOS compounds detected in our field samples and source samples, as the MS data are obtained from Cui et al. (2019) and Tang et al. (2020).

| Source samples            | Formula number | MW <sub>w</sub> | H/C <sub>w</sub> | O/C <sub>w</sub> | O/S <sub>w</sub> | DBE <sub>w</sub> | % of X <sub>c</sub> ≥2.5 | % of (4s+3n)/o ≤1 |
|---------------------------|----------------|-----------------|------------------|------------------|------------------|------------------|--------------------------|-------------------|
| BBOA1(Musa)               | 444            | 360             | 1.52             | 0.47             | 6.21             | 4.76             | 43                       | 88                |
| BBOA2(Hevea)              | 174            | 396             | 1.35             | 0.40             | 5.97             | 7.68             | 59                       | 86                |
| CCOA1(Anthracite)         | 549            | 323             | 1.01             | 0.40             | 5.40             | 8.55             | 82                       | 95                |
| CCOA2(Bituminous coal)    | 463            | 340             | 0.99             | 0.31             | 4.64             | 9.90             | 94                       | 85                |
| Tunnel aerosol            | 635            | 325             | 1.74             | 0.59             | 6.79             | 2.75             | 23                       | 96                |
| Vehicle emission          | 112            | 441             | 1.31             | 0.25             | 4.47             | 9.54             | 71                       | 75                |
| Excavator-idling(diesel)  | 1004           | 353             | 1.61             | 0.38             | 5.81             | 4.18             | 58                       | 96                |
| Excavator-moving(diesel)  | 334            | 326             | 1.51             | 0.46             | 5.20             | 3.58             | 49                       | 98                |
| Excavator-working(diesel) | 631            | 342             | 1.63             | 0.36             | 5.44             | 4.00             | 55                       | 93                |
| Diesel-vessel             | 334            | 306             | 1.66             | 0.40             | 5.14             | 3.47             | 50                       | 95                |
| Heavy-fuel-oil-vessel     | 1110           | 311             | 1.48             | 0.36             | 4.77             | 4.85             | 71                       | 83                |
| Suburban summer           | 1069           | 300             | 1.88             | 0.58             | 5.21             | 2.06             | 7                        | 86                |
| Urban summer              | 1127           | 302             | 1.81             | 0.53             | 5.12             | 2.18             | 10                       | 85                |
| Urban winter              | 1412           | 285             | 1.62             | 0.45             | 4.98             | 2.56             | 18                       | 92                |

**Table S11.** Summary of molecular characteristics of CHONS compounds detected in our field samples and source samples, as the MS data are obtained from Cui et al. (2019) and Tang et al. (2020).

| Source samples            | Formula number | MW <sub>w</sub> | H/C <sub>w</sub> | O/C <sub>w</sub> | O/S <sub>w</sub> | DBE <sub>w</sub> | % of X <sub>c</sub> ≥2.5 | % of (4s+3n)/o ≤1 |
|---------------------------|----------------|-----------------|------------------|------------------|------------------|------------------|--------------------------|-------------------|
| BBOA1(Musa)               | 371            | 379             | 1.55             | 0.50             | 7.21             | 4.98             | 64                       | 64                |
| BBOA2(Hevea)              | 65             | 411             | 1.56             | 0.50             | 7.51             | 4.79             | 69                       | 63                |
| CCOA1(Anthracite)         | 767            | 340             | 0.98             | 0.52             | 6.49             | 8.99             | 97                       | 47                |
| CCOA2(Bituminous coal)    | 293            | 308             | 0.97             | 0.49             | 5.82             | 8.04             | 93                       | 29                |
| Tunnel aerosol            | 410            | 340             | 1.81             | 0.90             | 8.73             | 2.78             | 29                       | 91                |
| Vehicle emission          | 17             | 400             | 1.17             | 0.72             | 8.59             | 6.92             | 59                       | 47                |
| Excavator-idling(diesel)  | 310            | 325             | 1.47             | 0.41             | 5.59             | 5.18             | 65                       | 42                |
| Excavator-moving(diesel)  | 117            | 298             | 1.62             | 0.48             | 5.17             | 5.55             | 64                       | 9                 |
| Excavator-working(diesel) | 260            | 323             | 1.47             | 0.40             | 5.41             | 5.26             | 69                       | 27                |
| Diesel-vessel             | 13             | 461             | 1.50             | 0.36             | 6.74             | 9.38             | 38                       | 46                |
| Heavy-fuel-oil-vessel     | 398            | 343             | 1.35             | 0.39             | 5.68             | 6.35             | 86                       | 28                |
| Suburban summer           | 895            | 325             | 1.60             | 0.77             | 7.54             | 4.27             | 11                       | 73                |
| Urban summer              | 787            | 332             | 1.53             | 0.69             | 6.98             | 4.89             | 15                       | 89                |
| Urban winter              | 1277           | 322             | 1.44             | 0.65             | 6.44             | 6.02             | 21                       | 92                |

## References

- Bruggemann, M., Xu, R., Tilgner, A., Kwong, K. C., Mutzel, A., Poon, H. Y., et al. (2020). Organosulfates in Ambient Aerosol: State of Knowledge and Future Research Directions on Formation, Abundance, Fate, and Importance, *Environ. Sci. Technol.*, 54(7), 3767-3782, <https://doi.org/10.1021/acs.est.9b06751>
- Cui, M., Li, C., Chen, Y., Zhang, F., Li, J., Jiang, B., et al. (2019). Molecular characterization of polar organic aerosol constituents in off-road engine emissions using Fourier transform ion cyclotron resonance mass spectrometry (FT-ICR MS): implications for source apportionment, *Atmos. Chem. Phys.*, 19(22), 13945-13956, <https://doi.org/10.5194/acp-19-13945-2019>
- Jiang, B., Kuang, B. Y., Liang, Y., Zhang, J., Huang, X. H. H., Xu, C., et al. (2016). Molecular composition of urban organic aerosols on clear and hazy days in Beijing: a comparative study using FT-ICR MS, *Environ. Chem.*, 13(5), 888-901, <https://doi.org/10.1071/en15230>
- Jiang, H., Li, J., Tang, J., Cui, M., Zhao, S., Mo, Y., et al. (2022). Molecular characteristics, sources, and formation pathways of organosulfur compounds in ambient aerosol in Guangzhou, South China, *Atmospheric Chemistry and Physics*, 22(10), 6919-6935, <https://doi.org/10.5194/acp-22-6919-2022>
- Lin, P., Rincon, A. G., Kalberer, M., & Yu, J. Z. (2012). Elemental Composition of HULIS in the Pearl River Delta Region, China: Results Inferred from Positive and Negative Electrospray High Resolution Mass Spectrometric Data, *Environmental Science & Technology*, 46(14), 7454-7462, <https://doi.org/10.1021/es300285d>
- Ning, C., Tang, Y., Sun, H., Wang, D., Sun, S., & Gao, Y. (2025). Molecular characteristics and formation pathways of organosulfates in atmospheric fine particles: A case study in steel industrial city during winter heating period, *Journal of Hazardous Materials*, 495(138882), <https://doi.org/https://doi.org/10.1016/j.jhazmat.2025.138882>
- O'Brien, R. E., Laskin, A., Laskin, J., Rubitschun, C. L., Surratt, J. D., & Goldstein, A. H. (2014). Molecular characterization of S- and N-containing organic constituents in ambient aerosols by negative ion mode high-resolution Nanospray Desorption Electrospray Ionization Mass Spectrometry: CalNex 2010 field study, *J. Geophys. Res. Atmos.*, 119(22), 12706-12720, <https://doi.org/10.1002/2014jd021955>
- Rincón, A. G., Calvo, A. I., Dietzel, M., & Kalberer, M. (2012). Seasonal differences of urban organic aerosol composition – an ultra-high resolution mass spectrometry study, *Environmental Chemistry*, 9(298-319), [https://doi.org/10.1071/EN12016\\_AC](https://doi.org/10.1071/EN12016_AC)
- Tang, J., Li, J., Su, T., Han, Y., Mo, Y., Jiang, H., et al. (2020). Molecular compositions and optical properties of dissolved brown carbon in biomass burning, coal combustion, and vehicle emission aerosols illuminated by excitation–emission matrix spectroscopy and Fourier transform ion cyclotron resonance mass spectrometry analysis, *Atmos. Chem. Phys.*, 20(4), 2513-2532, <https://doi.org/10.5194/acp-20-2513-2020>
- Wang, D., Shen, Z., Yang, X., Huang, S., Luo, Y., Bai, G., et al. (2024). Insight into the Role of NH<sub>3</sub>/NH<sub>4</sub><sup>+</sup> and NO<sub>x</sub>/NO<sub>3</sub><sup>-</sup> in the Formation of Nitrogen-Containing Brown Carbon in Chinese Megacities, *Environmental Science & Technology*, 58(9), 4281-4290, <https://doi.org/10.1021/acs.est.3c10374>
- Wang, K., Huang, R.-J., Brüggemann, M., Zhang, Y., Yang, L., Ni, H., et al. (2021). Urban organic aerosol composition in eastern China differs from north to south: molecular insight from a liquid chromatography–mass spectrometry (Orbitrap) study, *Atmos. Chem. Phys.*, 21(11), 9089-9104, <https://doi.org/10.5194/acp-21-9089-2021>
- Wang, K., Zhang, Y., Huang, R.-J., Cao, J., & Hoffman, T. (2018). UHPLC-Orbitrap mass spectrometric characterization of organic aerosol from a central European city (Mainz, Germany) and a Chinese megacity (Beijing), *Atmospheric Environment*, 189(22-29), <https://doi.org/10.1016/j.atmosenv.2018.06.036>
- Wang, K., Zhang, Y., Huang, R. J., Wang, M., Ni, H., Kampf, C. J., et al. (2019). Molecular Characterization and Source Identification of Atmospheric Particulate

- Organosulfates Using Ultrahigh Resolution Mass Spectrometry, *Environ. Sci. Technol.*, 53(11), 6192-6202, <https://doi.org/10.1021/acs.est.9b02628>
- Wang, X., Hayeck, N., Brüggemann, M., Yao, L., Chen, H., Zhang, C., et al. (2017). Chemical Characteristics of Organic Aerosols in Shanghai: A Study by Ultrahigh-Performance Liquid Chromatography Coupled With Orbitrap Mass Spectrometry, *J. Geophys. Res. Atmos.*, 122(21), 11703-11722, <https://doi.org/10.1002/2017jd026930>
- Wang, X. K., Rossignol, S., Ma, Y., Yao, L., Wang, M. Y., Chen, J. M., et al. (2016). Molecular characterization of atmospheric particulate organosulfates in three megacities at the middle and lower reaches of the Yangtze River, *Atmos. Chem. Phys.*, 16(2285–2298), <https://doi.org/10.5194/acp-16-2285-2016>
- Willoughby, A. S., Wozniak, A. S., & Hatcher, P. G. (2014). A molecular-level approach for characterizing water-insoluble components of ambient organic aerosol particulates using ultrahigh-resolution mass spectrometry, *Atmos. Chem. Phys.*, 14(18), 10299-10314, <https://doi.org/10.5194/acp-14-10299-2014>
- Ye, Y., Zhan, H., Yu, X., Li, J., Wang, X., & Xie, Z. (2020). Detection of organosulfates and nitrooxy-organosulfates in Arctic and Antarctic atmospheric aerosols, using ultra-high resolution FT-ICR mass spectrometry, *Sci. Total Environ.*, 767(144339), <https://doi.org/10.1016/j.scitotenv.2020.144339>
- Zhu, M., Jiang, B., Li, S., Yu, Q., Yu, X., Zhang, Y., et al. (2019). Organosulfur Compounds Formed from Heterogeneous Reaction between SO<sub>2</sub> and Particulate-Bound Unsaturated Fatty Acids in Ambient Air, *Environ. Sci. Technol. Lett.*, 6(6), 318-322, <https://doi.org/10.1021/acs.estlett.9b00218>
